# Supplementary material for: Integrating genetic and gene expression evidence into genome-wide association analysis of gene sets
Source: HighWire-hosted journal article supplement (doi:10.1101/gr.124370.111), 2011-09-22
Supplement: Xiong_GSAA_Document_S1.pdf [file Xiong_GSAA_Document_S1.pdf]

# Document S1: Appendix

## Differential gene expression score

For each gene, the differential expression score can be computed by a variety of statistics. The five statistics we provide in the software are Signal2Noise, tTest, Ratio\_of\_Classes, Diff\_of\_Classes, and log2\_Ratio\_of\_Classes.

Consider two phenotype classes,  $C_1$  and  $C_2$ :

**1, Signal2Noise** is the difference of the class means scaled by the standard deviation

$$\frac{\mu_1 - \mu_2}{\sigma_1 + \sigma_2}$$

where  $(\mu_1, \mu_2)$  and  $(\sigma_1, \sigma_2)$  are the means and standard deviations of a gene's expression values in classes  $C_1$  and  $C_2$ , respectively. The absolute magnitude of the statistic indicates the strength of the correlation between the gene expression profile and the phenotype, and the sign indicates the direction of this correlation.

**2, tTest** is the difference of the class means scaled by the standard deviation and number of samples

$$\frac{\mu_1 - \mu_2}{\sqrt{\frac{\sigma_1^2}{n_1} + \frac{\sigma_2^2}{n_2}}}$$

where  $(\mu_1, \mu_2)$  and  $(\sigma_1, \sigma_2)$  are the means and standard deviations of a gene's expression values in classes  $C_1$  and  $C_2$ , respectively.  $(n_1, n_2)$  are the number of samples in classes  $C_1$  and  $C_2$ . The absolute magnitude of the statistic indicates the strength of the correlation between the gene expression profile and the phenotype, and the sign indicates the direction of this correlation.

**3, Ratio\_of\_Classes** is the ratio of the class means

$$\frac{\mu_1}{\mu_2}$$

where  $(\mu_1, \mu_2)$  are the means of a gene's expression values in classes  $C_1$  and  $C_2$ , respectively. This statistic is used to calculate fold change for natural scale data. The absolute magnitude of the statistic indicates the strength of the correlation between the gene expression profile and the phenotype.

**4, Diff\_of\_Classes** is the difference of the class means

$$\mu_1 - \mu_2$$

where  $(\mu_1, \mu_2)$  are the means of a gene's expression values in classes  $C_1$  and  $C_2$ , respectively. This statistic is used to calculate fold change for log scale data. The absolute magnitude of the statistic indicates the strength of the correlation between the gene expression profile and the phenotype, and the sign indicates the direction of this correlation.

**5, log2\_Ratio\_of\_Classes** is the log2 ratio of the class means

$$\log_2\left(\frac{\mu_1}{\mu_2}\right)$$

where  $(\mu_1, \mu_2)$  are the means of a gene's expression values in classes  $C_1$  and  $C_2$ , respectively. This statistic is used to calculate fold change for natural scale data. The absolute magnitude of the statistic indicates the strength of the correlation between the gene expression profile and the phenotype. In this case negative values are truncated to 0 since they are not biologically meaningful.

## Single-SNP association score

Five different methods to calculate single-SNP association scores are provided in our software: a genotype-based chi-square statistic, an allele-based chi-square statistic, a statistic based on frequency differences in major/minor alleles in the two classes, and two statistics extended from genotype-based and allele-based chi-square statistics.

**1, ChiSquare\_Allele** is an allele-based chi-square score

Suppose alleles for a bi-allelic SNP in the SNP dataset are encoded as A and B, or alternatively as groups  $G_1$  and  $G_2$ . We first define two scaling factors,  $K_1$  and  $K_2$ , to adjust for unequal sample sizes between class  $C_1$  and  $C_2$ :

$$K_1 = \sqrt{\frac{\sum_{i=1}^2 S_i^2}{\sum_{i=1}^2 R_i^2}}, \quad K_2 = 1/K_1,$$

where  $R_i$  is the observed counts for group  $G_i$  in class  $C_1$ , and  $S_i$  is the observed counts for group  $G_i$  in class  $C_2$ .

The allele-based chi-square score is then computed as

$$\chi^2 = \sum_{i=1}^2 \frac{(K_1 R_i - K_2 S_i)^2}{R_i + S_i}.$$

The test statistic value represents the degree to which the SNP is associated with phenotypic class distinction.

**2, ChiSquare\_Geno** is a genotype-based chi-square score

Suppose genotypes for a bi-allelic SNP in the SNP dataset are encoded as AA, AB, and BB, or alternatively as groups  $G_1$ ,  $G_2$ , and  $G_3$ . We first define two scaling factors,  $K_1$  and  $K_2$ , to adjust for unequal sample sizes between class  $C_1$  and  $C_2$ :

$$K_1 = \sqrt{\frac{\sum_{i=1}^3 S_i}{\sum_{i=1}^3 R_i}}, \quad K_2 = 1/K_1,$$

where  $R_i$  is the observed counts for group  $G_i$  in class  $C_1$ , and  $S_i$  is the observed counts for group  $G_i$  in class  $C_2$ .

The genotype-based chi-square score is then computed as

$$\chi^2 = \sum_{i=1}^3 \frac{(K_1 R_i - K_2 S_i)^2}{R_i + S_i}.$$

The test statistic value represents the degree to which the SNP is associated with phenotypic class distinction.

**3, Diff\_of\_Alleles** is the absolute value of frequency difference of the major/minor allele in two classes

$$|f_1 - f_2|$$

where  $(f_1, f_2)$  is the frequency of the major/minor allele in classes  $C_1$  and  $C_2$ , respectively. The test statistic value represents the degree to which the SNP is associated with phenotypic class distinction.

**4, tTest\_Allele** is an allele-based score derived from **ChiSquare\_Allele**

Suppose alleles for a bi-allelic SNP in the SNP dataset are encoded as A and B, or alternatively as groups  $G_1$  and  $G_2$ . We first define two scaling factors,  $K_1$  and  $K_2$ , to adjust for unequal sample sizes between class  $C_1$  and  $C_2$ :

$$K_1 = \sqrt{\frac{\sum_{i=1}^2 S_i}{\sum_{i=1}^2 R_i}}, \quad K_2 = 1/K_1,$$

where  $R_i$  is the observed counts for group  $G_i$  in class  $C_1$ , and  $S_i$  is the observed counts for group  $G_i$  in class  $C_2$ .

The **tTest\_Allele** is then computed as

$$t = \sum_{i=1}^2 \frac{|K_1 R_i - K_2 S_i|}{R_i + S_i}.$$

The test statistic value represents the degree to which the SNP is associated with phenotypic class distinction.

**5, tTest\_Geno** is a genotype-based score derived from **ChiSquare\_Geno**

Suppose genotypes for a bi-allelic SNP in the SNP dataset are encoded as AA, AB, and BB, or alternatively as groups  $G_1$ ,  $G_2$ , and  $G_3$ . We first define two scaling factors,  $K_1$  and  $K_2$ , to adjust for unequal sample sizes between class  $C_1$  and  $C_2$ :

$$K_1 = \sqrt{\frac{\sum_{i=1}^3 S_i}{\sum_{i=1}^3 R_i}}, \quad K_2 = 1/K_1,$$

where  $R_i$  is the observed counts for group  $G_i$  in class  $C_1$ , and  $S_i$  is the observed counts for group  $G_i$  in class  $C_2$ .

The **tTest\_Geno** is then computed as

$$t = \sum_{i=1}^3 \frac{|K_1 R_i - K_2 S_i|}{R_i + S_i}.$$

The test statistic value represents the degree to which the SNP is associated with phenotypic class distinction.
